# Supplementary material for: Enamel Matrix Derivative Suppresses Chemokine Expression in Oral Epithelial Cells
Source: MDPI journal article supplement (doi:10.3390/ijms241813991), 2023-09-12
Supplement: s1 [file s1]

## Supplement Files

Supplement Table S1: RNAseq. HSC2 cells were incubated with LPS *E.coli*, LPS *P.gingivalis*, and TNF $\alpha$  for 24 h. RNA was subjected to RNAseq analysis. Chemokine genes are shown by the expression counts.

| Genes  | wo | LPS <i>E.coli</i> | LPS <i>P. gingivalis</i> | TNF $\alpha$ |
|--------|----|-------------------|--------------------------|--------------|
| CXCL1  | 12 | 6                 | 16                       | 262          |
| CXCL2  | 0  | 1                 | 1                        | 5            |
| CXCL3  | 2  | 1                 | 0                        | 22           |
| CXCL8  | 0  | 2                 | 3                        | 117          |
| CXCL9  | 0  | 0                 | 0                        | 29           |
| CXCL10 | 0  | 1                 | 0                        | 996          |
| CXCL11 | 0  | 0                 | 0                        | 214          |
| CXCL16 | 59 | 98                | 74                       | 546          |
| CCL5   | 6  | 6                 | 9                        | 372          |
| CCL20  | 0  | 3                 | 2                        | 47           |

Supplement Table S2: Gene expression of CXCL8 in HSC2 cells under TNF $\alpha$  and IL-1 $\beta$  stimulation. 10 ng/mL TGF- $\beta$  and 300  $\mu$ g/mL EMD reduced expression and 10  $\mu$ M SB431542 reversed the reduced effect provoked by EMD. Data shows the average and standard deviation of independent experiments.

| IL1 $\beta$ + TNF $\alpha$                                 | IL1 $\beta$ + TNF $\alpha$ +TGF- $\beta$ | IL1 $\beta$ + TNF $\alpha$ +TGF- $\beta$ +SB | IL1 $\beta$ +   | TNF $\alpha$ +EMD |
|------------------------------------------------------------|------------------------------------------|----------------------------------------------|-----------------|-------------------|
| <u>IL1<math>\beta</math>+TNF<math>\alpha</math>+EMD+SB</u> |                                          |                                              |                 |                   |
| 404.1 $\pm$ 62.1                                           | 155.5 $\pm$ 25.9                         | 290.6 $\pm$ 38.8                             | 76.3 $\pm$ 19.9 | 250.9 $\pm$ 3.6   |

Supplement Table S3: List of Abbreviations and Acronyms

| Abbreviation         | Definition                                     |
|----------------------|------------------------------------------------|
| EDM                  | Enamel matrix derivative                       |
| LPS                  | Lipopolysaccharide                             |
| <i>E. coli</i>       | Escherichia coli                               |
| <i>P. gingivalis</i> | Porphyromonas gingivalis                       |
| TNF $\alpha$         | Tumor necrosis factor-alpha                    |
| CXCL1                | C-X-C motif chemokine ligand 1                 |
| CCL5                 | CC-chemokine ligand 5                          |
| IL-1 $\beta$         | Interleukin-1 $\beta$                          |
| NF $\kappa$ B        | Nuclear factor kappa B                         |
| TGF- $\beta$         | Transforming growth factor- $\beta$            |
| ANOVA                | Analysis of variance                           |
| RM one-way ANOVA     | One-way repeated measures analysis of variance |
| RNAseq               | RNA Sequencing                                 |
| CD14                 | cluster of differentiation 14                  |
| TLR                  | toll-like receptor                             |
| IFN- $\lambda$ 1     | Interferon lambda-1                            |
| MX2                  | MX dynamin like GTPase 2                       |
| PPP1R3F              | Protein phosphatase 1 regulatory subunit 3F    |

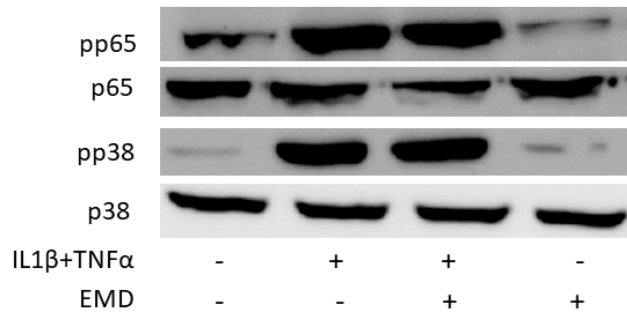

Supplement Figure S1: EMD cannot decrease the p65 and p38 phosphorylation in HSC2 cells. HSC2 cells were exposed to 300 µg/mL EMD with and without 10 ng/mL IL1β and TNFα aiming to induce the phosphorylation of p65 and p38. Western blot analysis shows the chemiluminescence signals obtained with the phosphor-p65 and p65 and phosphor-p38 and p38 antibodies
